# Supplementary material for: Imaging vesicle formation dynamics supports the flexible model of clathrin-mediated endocytosis
Source: Springer Nature journal article supplement (doi:10.1038/s41467-022-29317-1), 2022-04-01

## Supplementary Information

### **Imaging vesicle formation dynamics supports the flexible model of clathrin-mediated endocytosis.**

Tomasz J. Nawara<sup>1</sup>, Yancey D. Williams II<sup>1</sup>, Tejeshwar C. Rao<sup>1</sup>, Yuesong Hu<sup>2</sup>,  
Elizabeth Sztul<sup>1</sup>, Khalid Salaita<sup>2</sup> and Alexa L. Mattheyses<sup>1\*</sup>

<sup>1</sup>Department of Cell, Developmental, and Integrative Biology, University of  
Alabama at Birmingham, Birmingham, AL, USA.

<sup>2</sup>Department of Chemistry, Emory University, Atlanta, GA, USA.

\*Address correspondence to [mattheyses@uab.edu](mailto:mattheyses@uab.edu)

Contains:

Supplementary Figures 1-10

Supplementary Tables 1-8

Raw western blots

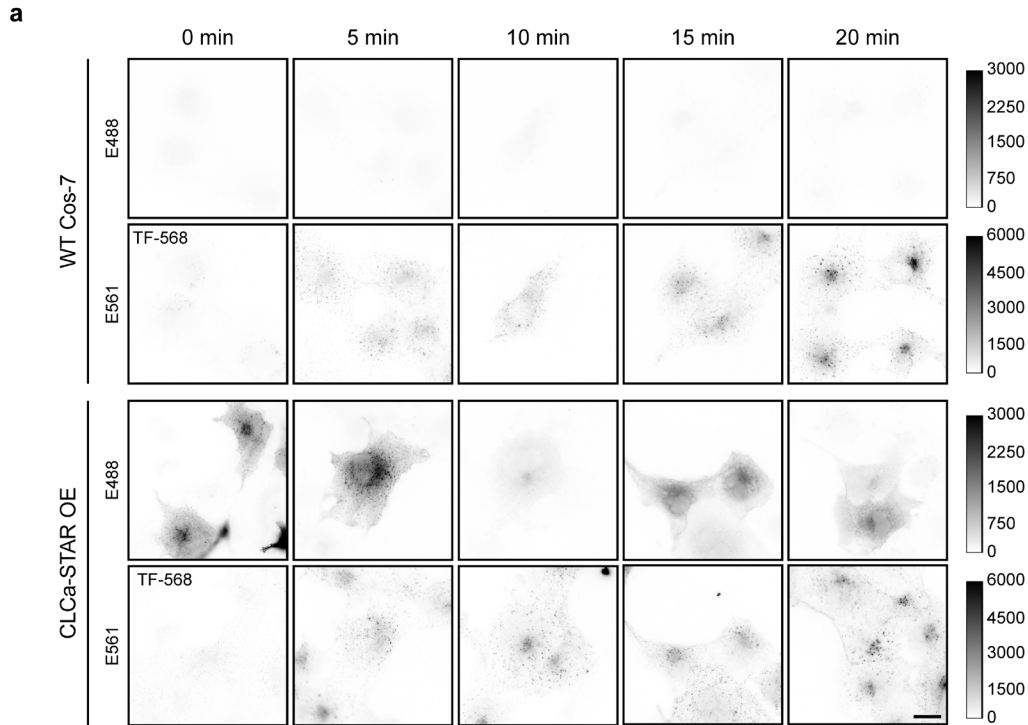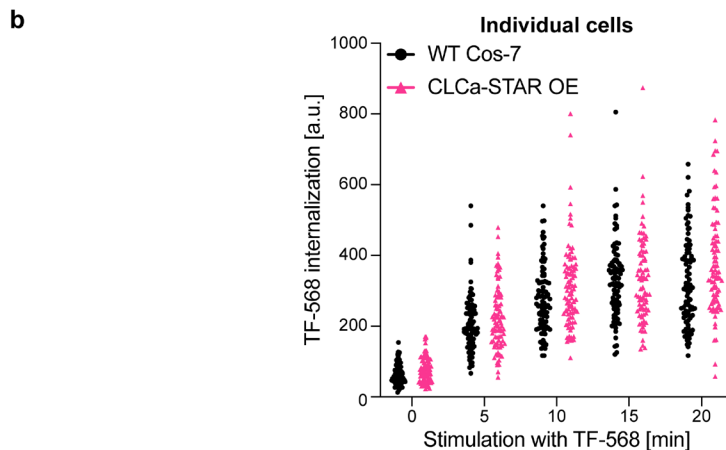

**Supplementary Fig. 1: CLCa-STAR does not disrupt overall CME dynamics and transferrin uptake. a** Representative Cos-7 cells from each time point of the transferrin-568 (TF-568) uptake assay, E488 – CLCa-STAR, E561 – TF-568. Only the EGFP channel is visualized for both wild-type (WT) and CLCa-STAR overexpressing (OE) cells. **b** Scatter plot of mean TF-568 intensity per cell at 0, 5, 10, 15, and 20 min for WT Cos-7 (n = 93, 93, 93, 93, 93 cells) and for CLCa-STAR OE (n = 89, 91, 93, 86, 92 cells). Data **a** and **b** is from three independent repeats).

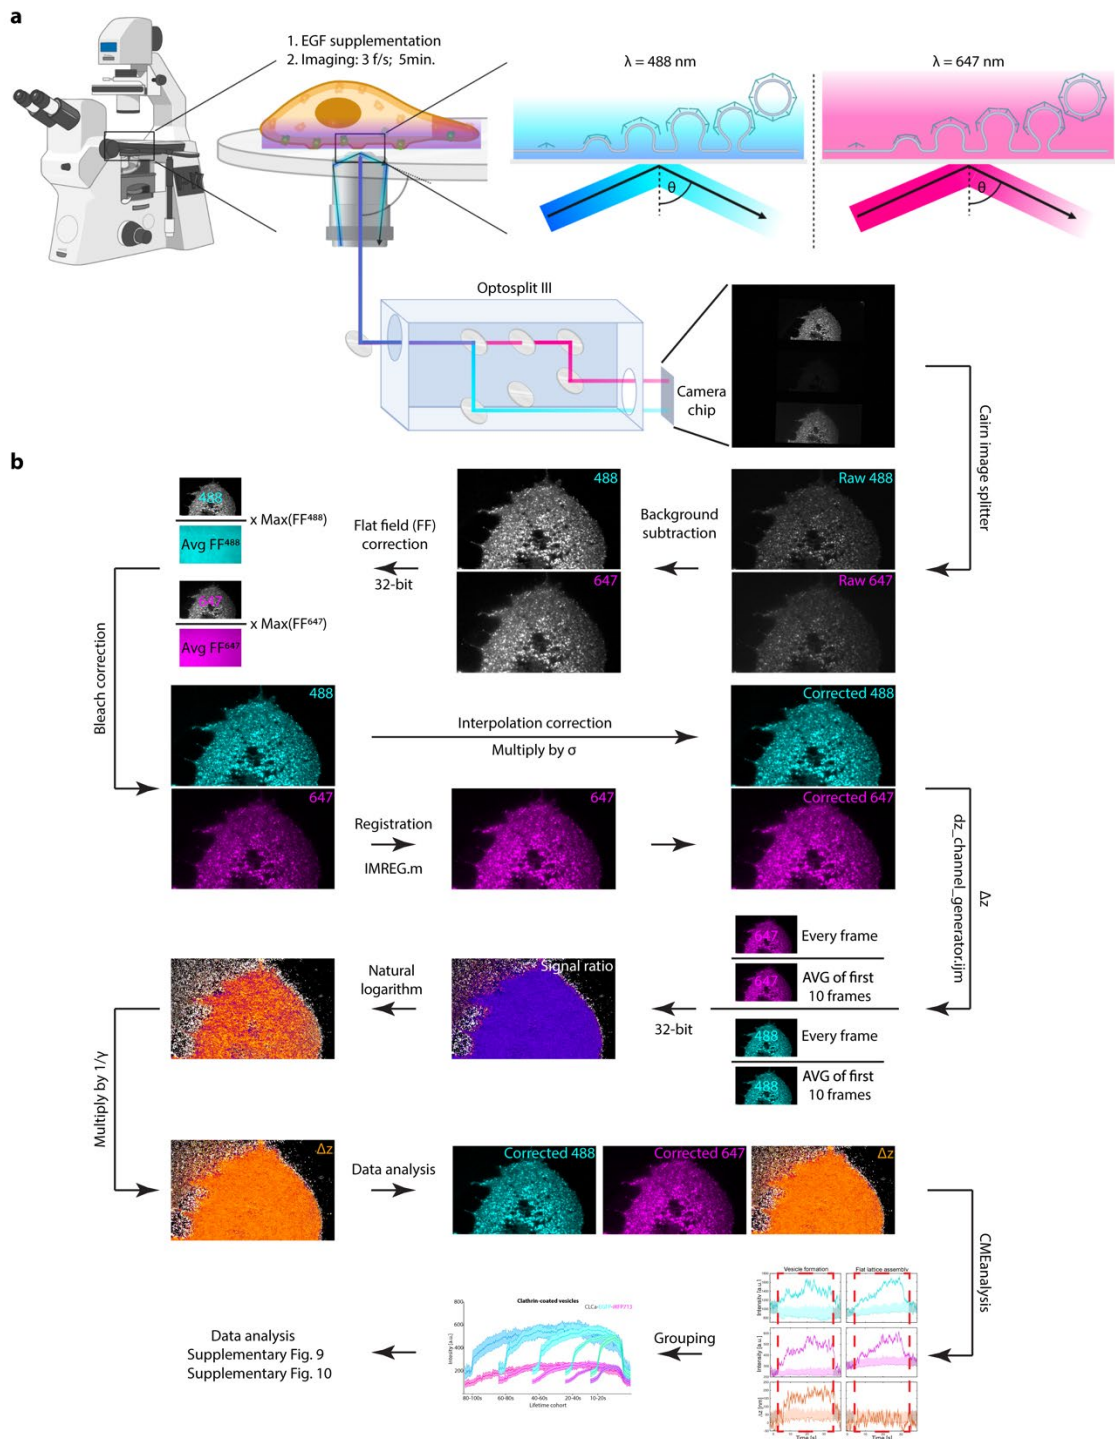

**Supplementary Fig. 2: Experimental design, data acquisition, processing, and analysis. a** Experimental set up with simultaneous 488 and 647 TIRF imaging (Created with BioRender.com). **b** STAR data processing and analysis pipeline.

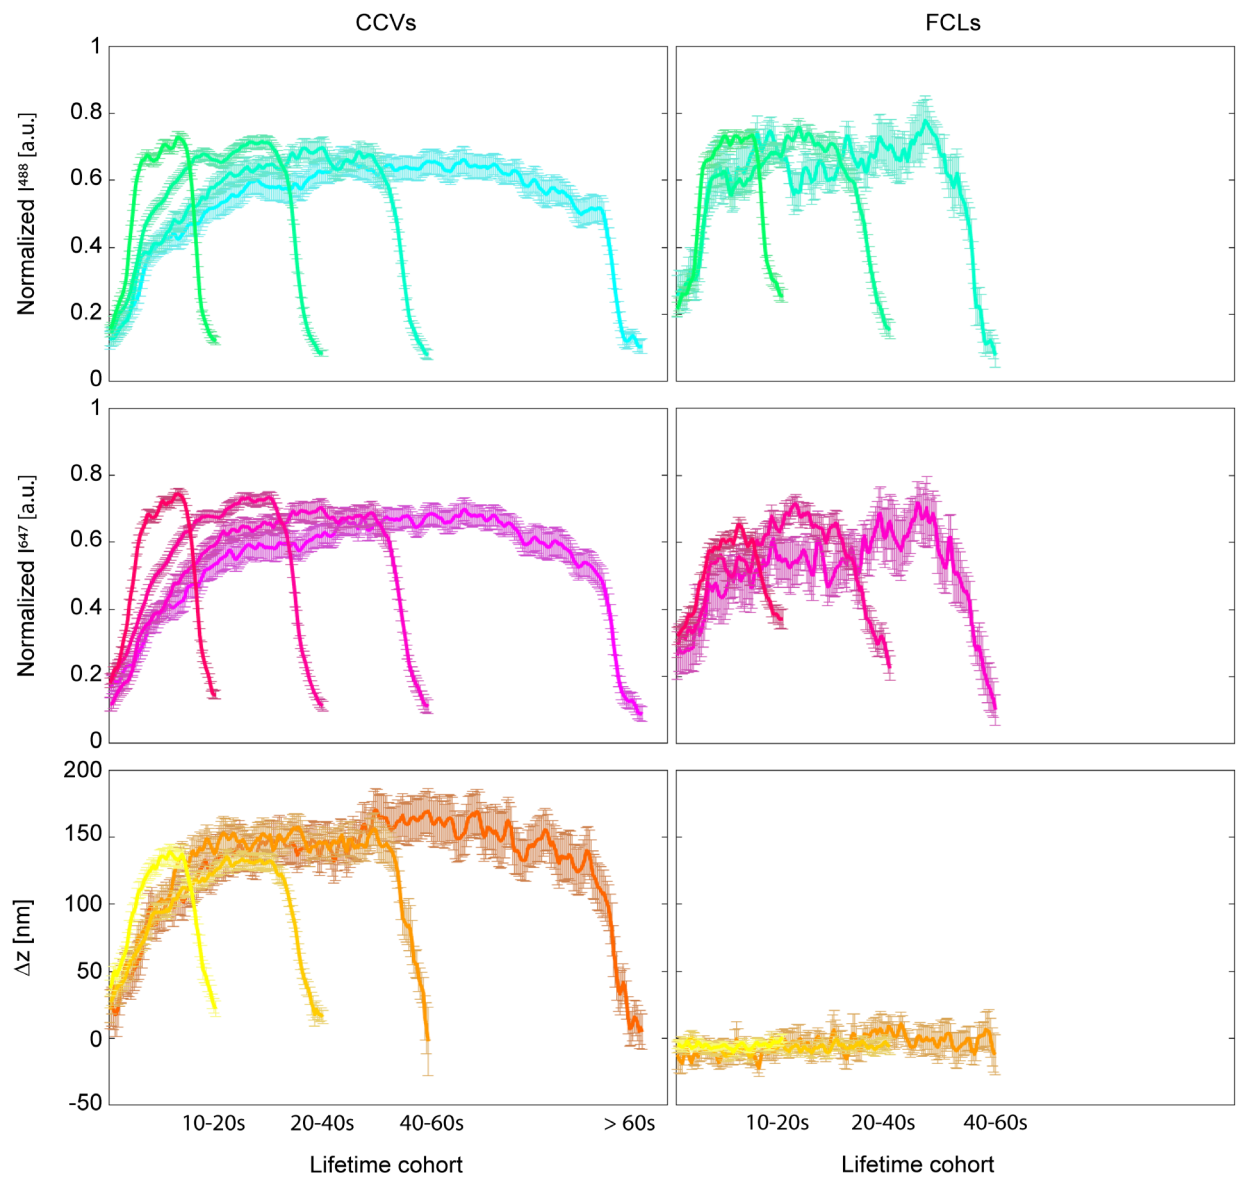

**Supplementary Fig. 3: Representative intensity and  $\Delta z$  traces for CMEanalysis identified CCSs.** Intensity was normalized for CLCa-STAR in both colors. Means  $\pm$  SEMs for presented cohorts (CCVs: 10-20s – n = 147, 20-40s – n = 124, 40-60s – n = 40, >60s – n = 28; FCLs: 10-20s – n = 102, 20-40s – n = 34, 40-60s – n = 8, the cohort >60s was not displayed as too few tracks were present).

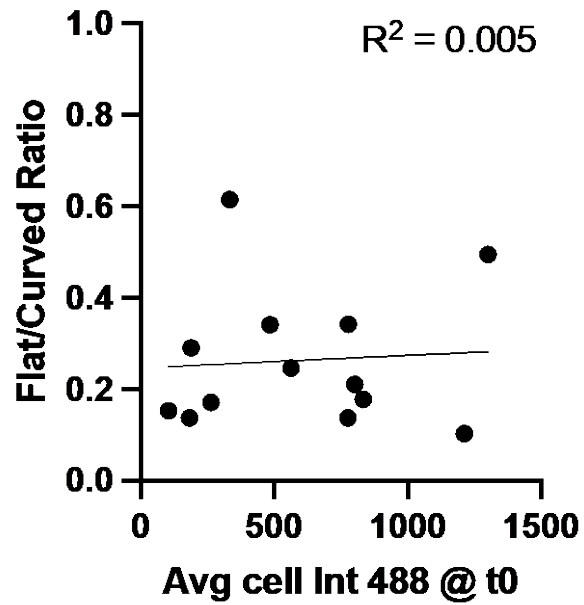

**Supplementary Fig. 4: Flat to Curved CCSs ratio is not alter by protein expression level in healthy cells.** The flat to curved CCSs ratio was calculated for cells from Figure 2 and was correlated with the overall EGFP intensity of the cell body at t<sub>0</sub>. No correlation was found by a simple linear regression ( $R^2 = 0.005$ ).

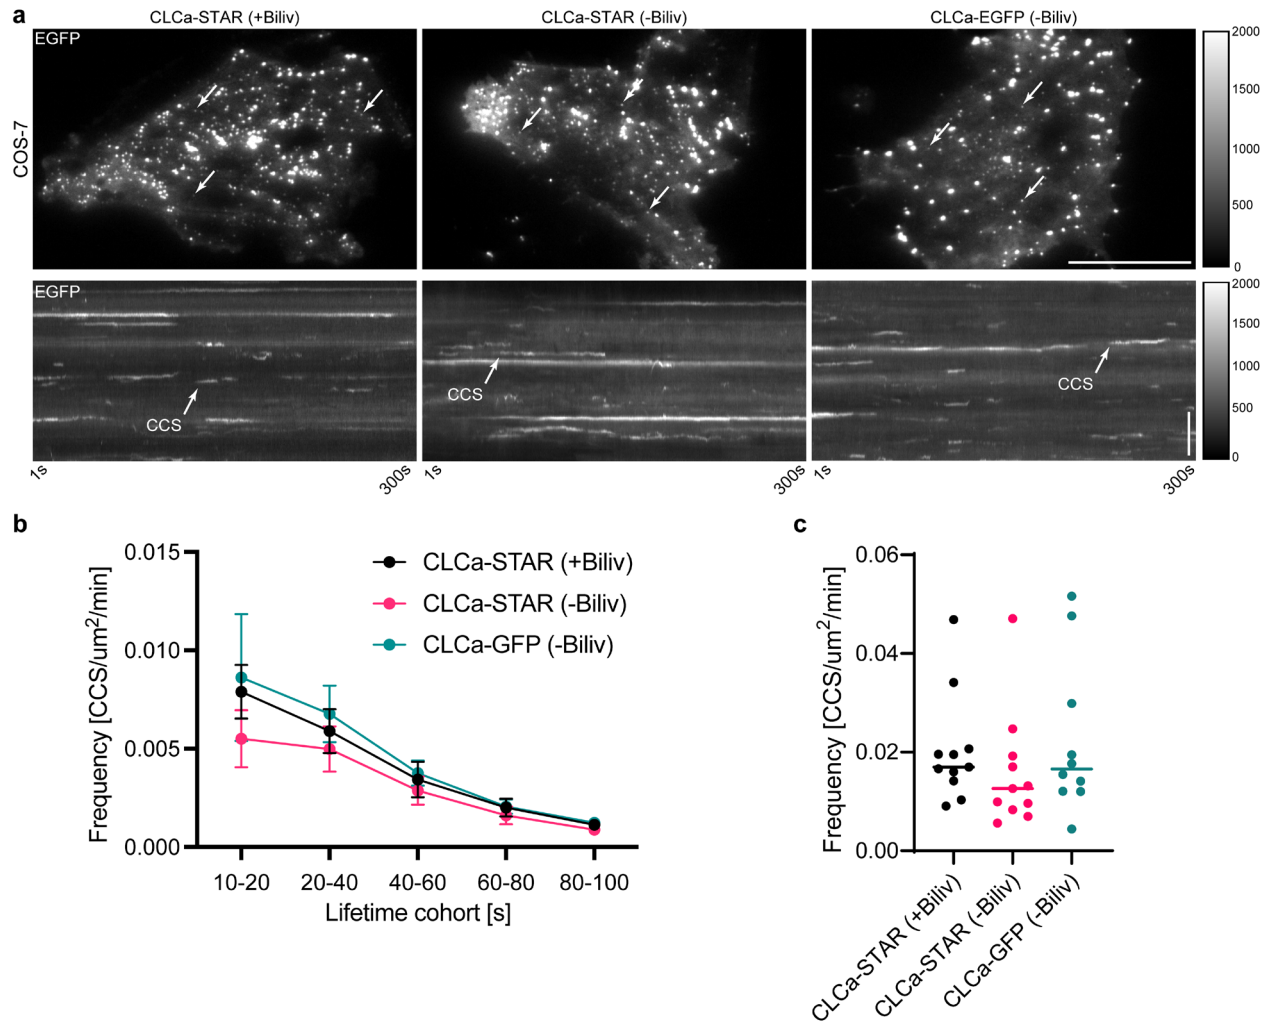

**Supplementary Fig. 5: CLCa-STAR, with or without the addition of iRFP713 cofactor biliverdin, behaves similarly to CLCa-EGFP.** **a** Cos-7 cell transfected with CLCa-STAR with biliverdin during starvation - CLCa-STAR (+Biliv), Cos-7 cell transfected with CLCa-STAR without biliverdin during starvation - CLCa-STAR (-Biliv), and Cos-7 cell transfected with CLCa-EGFP without biliverdin during starvation - CLCa-EGFP (-Biliv), imaged using TIRF 488, white arrows point towards example clathrin accumulations, scale bar = 20  $\mu$ m. Kymographs of clathrin accumulation (gray), white arrows point towards example clathrin accumulations, scale bar = 5  $\mu$ m. **b** Histogram of lifetime distribution of CCSs per  $\mu$ m<sup>2</sup>, per minute (mean  $\pm$  SEM). **c** Cumulative frequency of CCSs per  $\mu$ m<sup>2</sup>, per minute for each cell. Line – median, data was not normally distributed (one-sided Shapiro-Wilk test,  $p < 0.05$  for all three groups), medians were not significantly different as tested by Kruskal-Wallis test, approximate  $p > 0.05$ ; [median, n cells, n events] CLCa-STAR (+Biliv) = [0.01697, 11, 1847]; CLCa-STAR (-Biliv) = [0.01261, 11, 1383]; CLCa-EGFP (-Biliv) = [0.01657, 10, 1805] (Data in **b** and **c** is from two independent repeats).

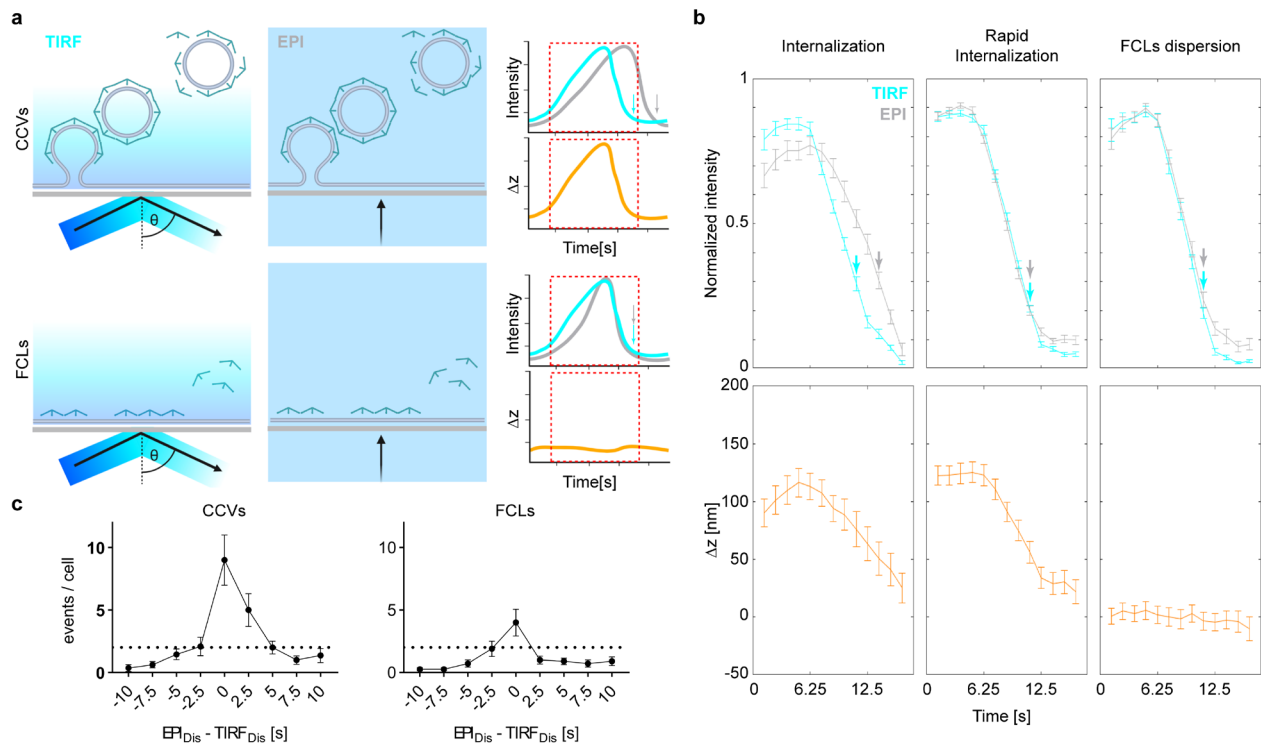

**Supplementary Fig. 6: EPI/STAR analysis of CCS dynamics.** **a** Principle of EPI/STAR analysis. As CCVs are internalized, they will disappear from the TIRF excitation field while remaining in EPI and positive  $\Delta z$  changes should be observed. In contrast FCLs, which do not result in endocytosis, should disappear simultaneously EPI and TIRF and no  $\Delta z$  changes should be observed (Created with BioRender.com). **b** Grouping of the EPI/STAR data based on the different signal disappearance dynamics from EPI and TIRF as well as the  $\Delta z$  for those puncta. Intensities are normalized. Means  $\pm$  SEMs (Representative traces from 2 replicates and 11 cells total: Internalization –  $n = 62$ , Rapid internalization –  $n = 132$ , FCLs dispersion –  $n = 44$ ). **c** Plot of the difference distribution between EPI disappearance ( $EPI_{Dis}$ ) and TIRF disappearance ( $TIRF_{Dis}$ ) of all analyzed puncta separated on whether  $\Delta z$  changes were or were not induced. Data are presented as mean values  $\pm$  SEM (CCVs –  $n = 252$  events, FCLs –  $n = 118$  events, data from 2 replicates and 11 cells total, cohorts with mean of 2 or less events were discarded from quantifications, the signal disappearance was identified as a first frame when signal reached below background for five consecutive frames).

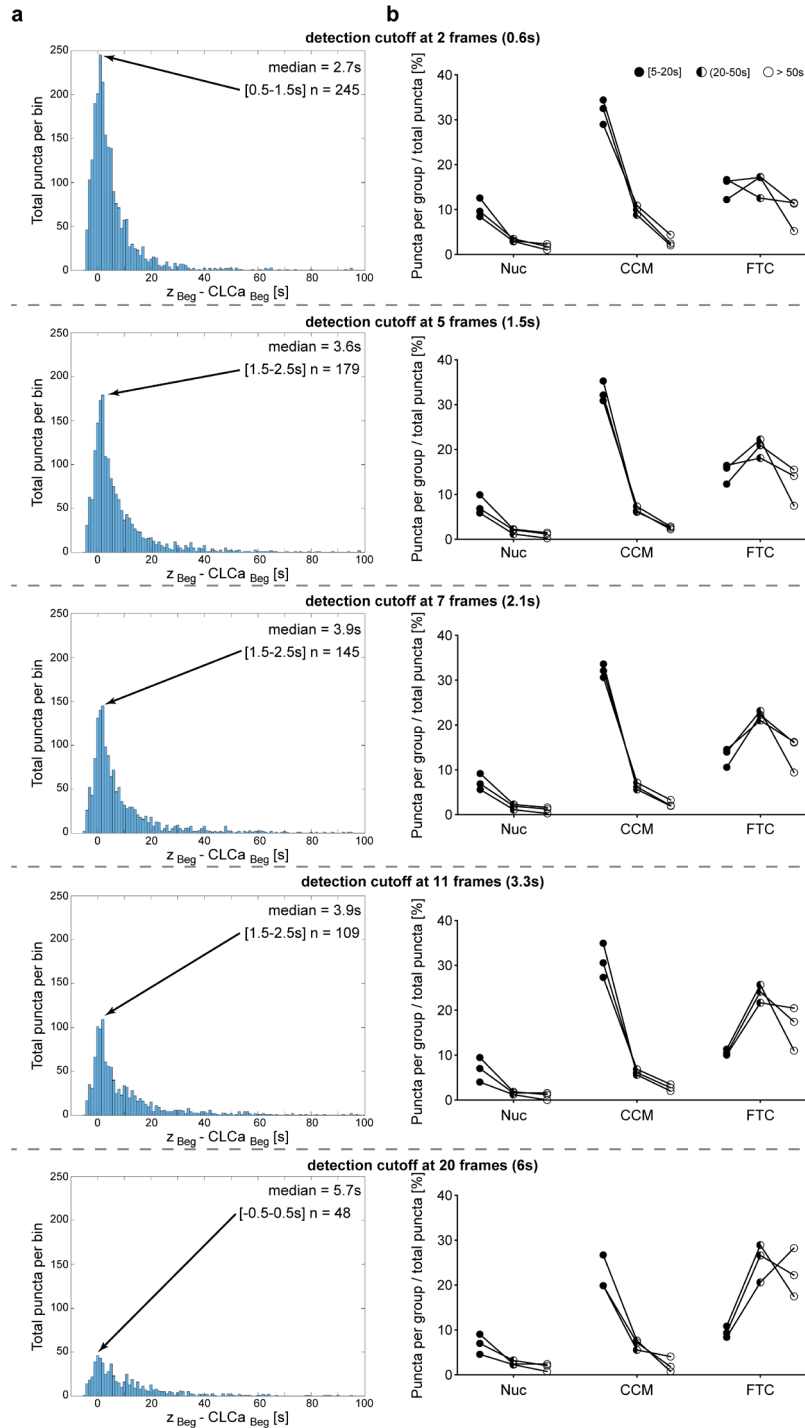

**Supplementary Fig. 7: Signal detection cut-off does not explain the variation in curvature formation.** **a** Data from Figure 3 was reanalyzed using a range of detection cut-offs from 2 to 20 frames as indicated. The distribution of  $\Delta z_{\text{Beg}} - \text{CLCa}_{\text{Beg}} [\text{s}]$  are shown as histograms for each cutoff. **b** Summary of the distribution of events across the three membrane bending models and lifetime cohorts. Statistical analysis is summarized in Supplementary Table 3.



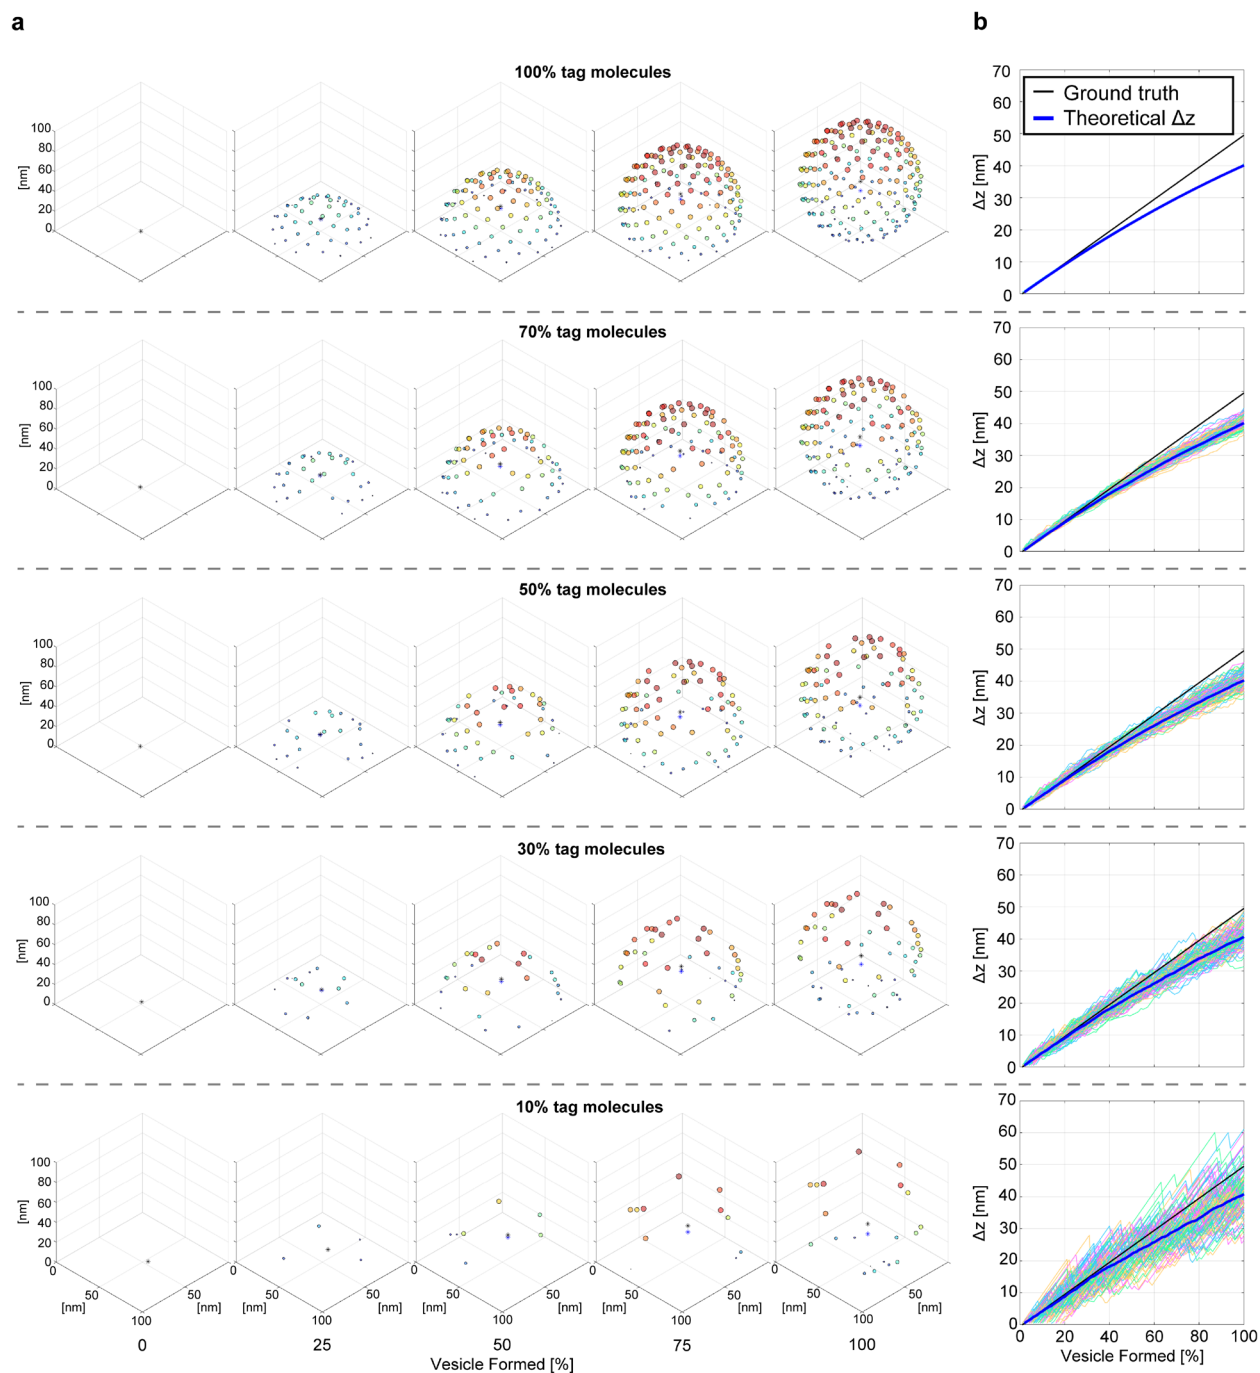

**Supplementary Fig. 8: Monte Carlo simulation of STAR measurements, with a variable amount of CLCa-STAR proteins present on the vesicle.** **a** Simulation of vesicle formation with varying percentages of CLCa-STAR tagged proteins distributed randomly on the vesicle; percentage tagged indicated above the plots. **b** Monte Carlo simulation of 100 CCVs (colored lines) and their theoretical  $\Delta z$  measured by STAR microscopy, the thick blue line indicates mean for the simulation and black line indicates the theoretical center of mass (CM) for forming CCVs.

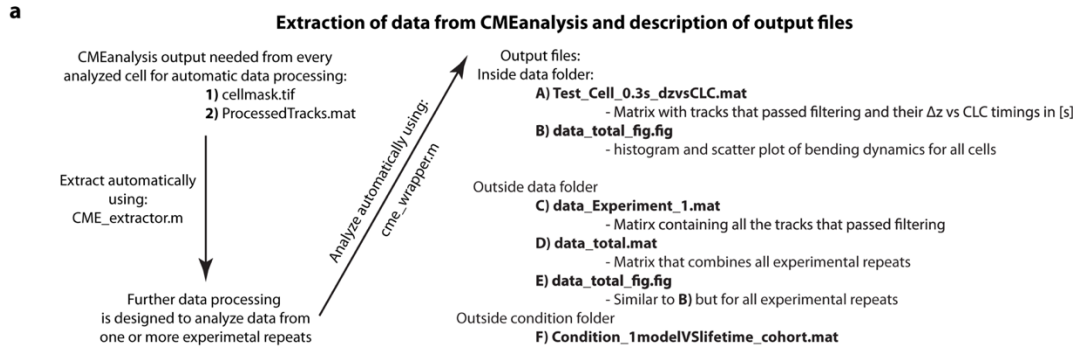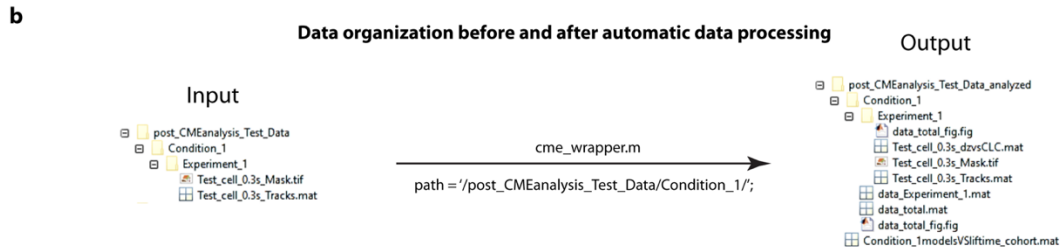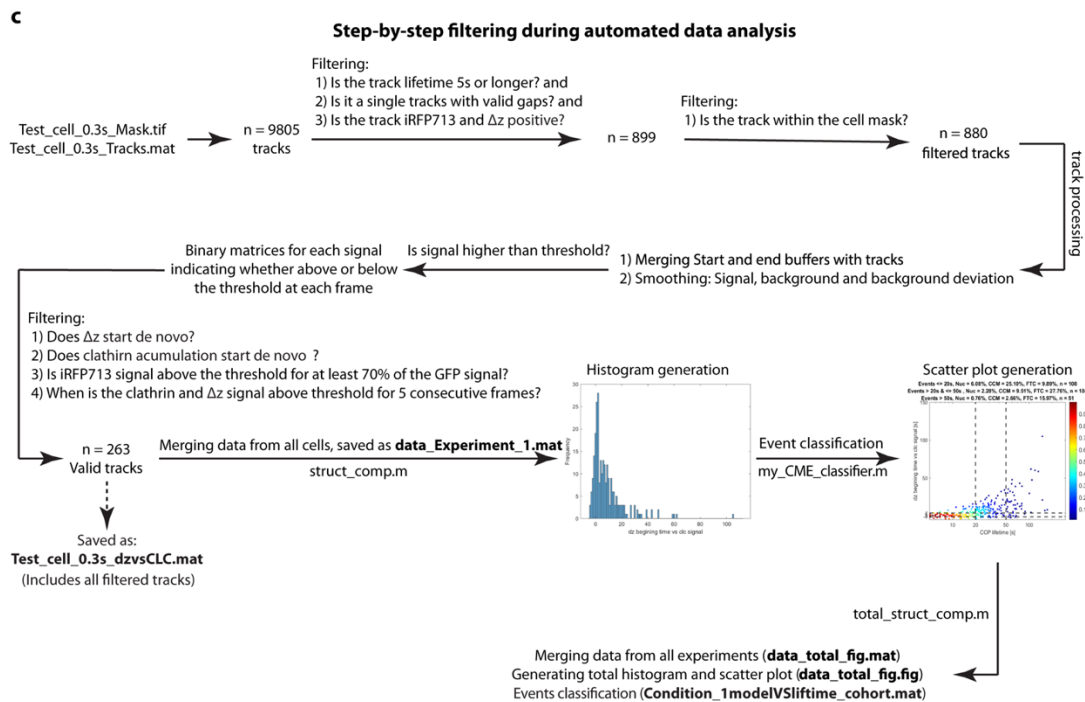

**Supplementary Fig. 9: Automated analysis of the initiation of curvature formation.**  
**a** CMEanalysis outputs needed for automated data analysis, and post processing files description. **b** Data organization pre and post automated data processing using the given executable code. **c** Step-by-step explanation of data filtering and visualization.

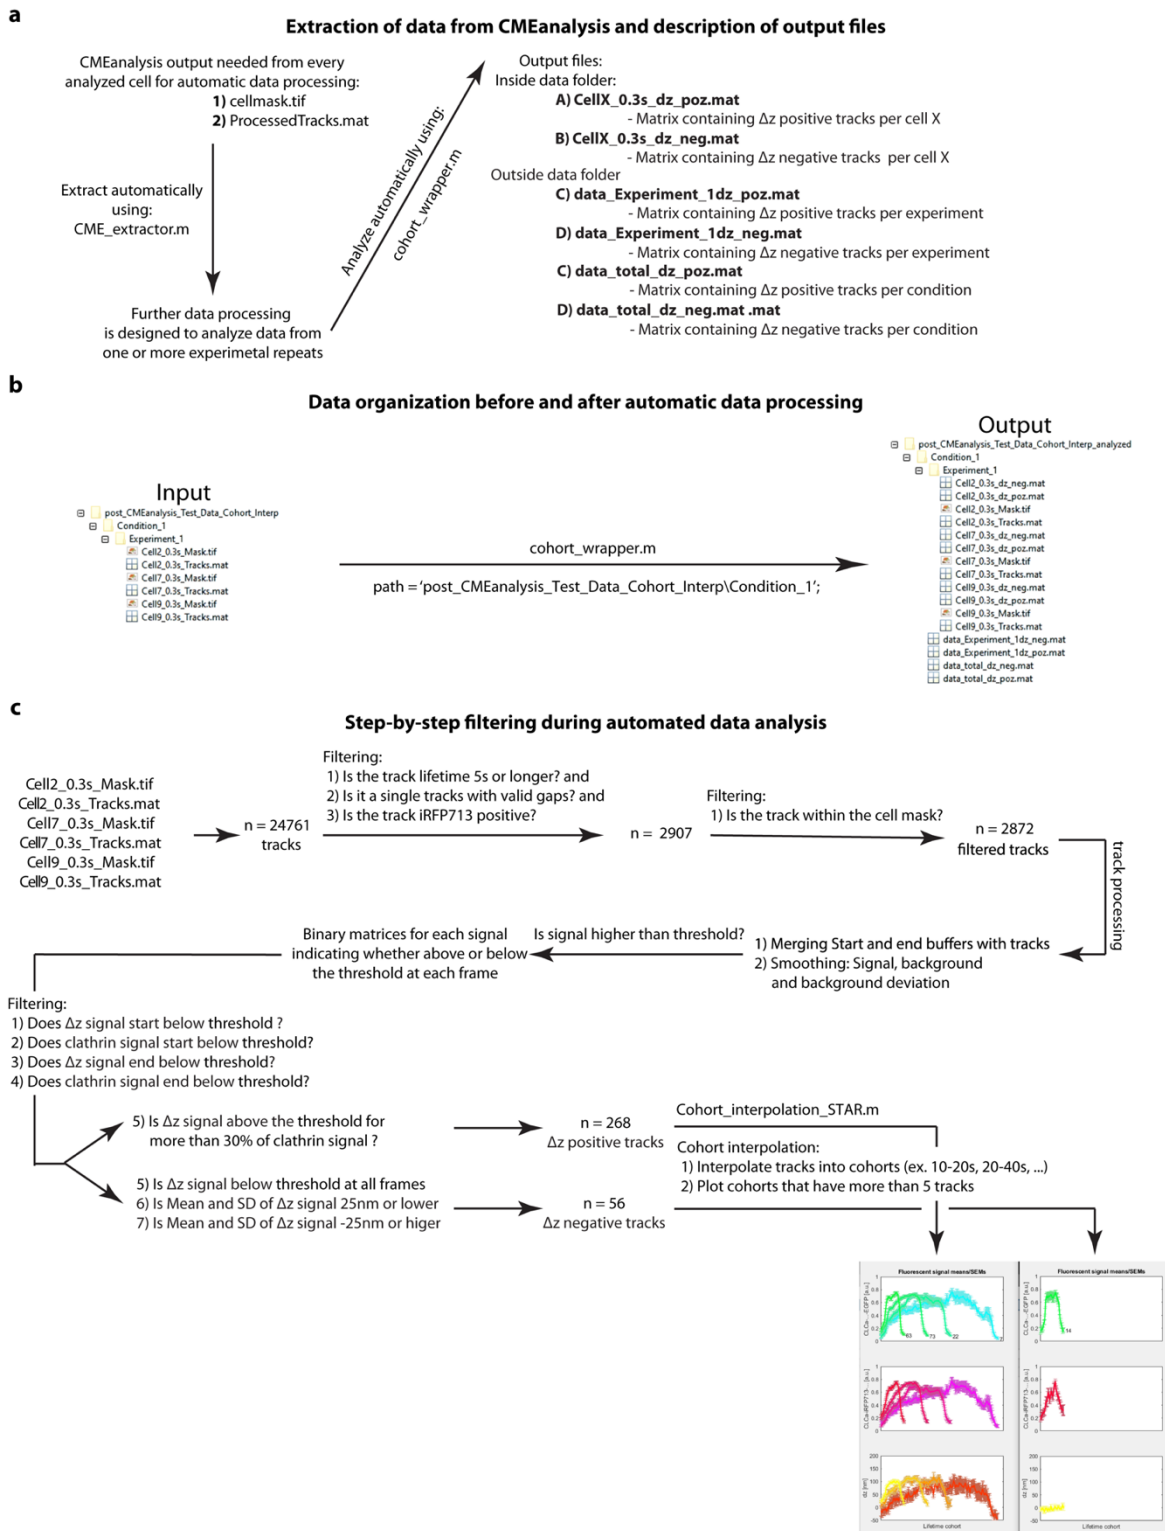

**Supplementary Fig. 10: Automated flat and curved events sorting.** **a** CMEanalysis outputs needed for automated data analysis, and post processing file descriptions. **b** Data

organization pre and post automated data processing using the given executable code.  
**c** Step-by-step explanation of data filtering and visualization.

**Supplementary Table 1:** Šídák's multiple comparisons statistics results for Fig. 1f, post two-way ANOVA. P values were adjusted for multiple comparison using statistical hypothesis testing.

| <b>Šídák's multiple comparisons test</b> | <b>Mean Diff.</b> | <b>95.00% CI of diff.</b> | <b>Summary</b> | <b>Adjusted P Value</b> |
|------------------------------------------|-------------------|---------------------------|----------------|-------------------------|
| <b>WT Cos-7</b>                          |                   |                           |                |                         |
| 0 vs. 5                                  | -143.9            | -433.5 to 145.8           | ns             | 0.1851                  |
| 0 vs. 10                                 | -214.7            | -415.8 to -13.68          | *              | 0.044                   |
| 0 vs. 15                                 | -268.3            | -503.4 to -33.22          | *              | 0.0387                  |
| 0 vs. 20                                 | -264.5            | -594.1 to 65.12           | ns             | 0.0764                  |
| 5 vs. 10                                 | -70.84            | -251.7 to 110.0           | ns             | 0.2776                  |
| 5 vs. 15                                 | -124.4            | -199.8 to -49.05          | *              | 0.0187                  |
| 5 vs. 20                                 | -120.6            | -454.1 to 212.8           | ns             | 0.3156                  |
| 10 vs. 15                                | -53.59            | -159.6 to 52.38           | ns             | 0.1793                  |
| 10 vs. 20                                | -49.78            | -224.8 to 125.2           | ns             | 0.4509                  |
| 15 vs. 20                                | 3.806             | -263.4 to 271.0           | ns             | >0.9999                 |
| <b>CLCa-STAR OE</b>                      |                   |                           |                |                         |
| 0 vs. 5                                  | -144.7            | -412.9 to 123.5           | ns             | 0.1597                  |
| 0 vs. 10                                 | -233.3            | -434.0 to -32.64          | *              | 0.0373                  |
| 0 vs. 15                                 | -255.6            | -442.4 to -68.82          | *              | 0.0271                  |
| 0 vs. 20                                 | -296.5            | -670.2 to 77.12           | ns             | 0.078                   |
| 5 vs. 10                                 | -88.61            | -200.4 to 23.17           | ns             | 0.0782                  |
| 5 vs. 15                                 | -110.9            | -303.9 to 82.12           | ns             | 0.1426                  |
| 5 vs. 20                                 | -151.8            | -263.7 to -39.96          | *              | 0.0275                  |
| 10 vs. 15                                | -22.28            | -239.7 to 195.1           | ns             | 0.9673                  |
| 10 vs. 20                                | -63.22            | -251.1 to 124.6           | ns             | 0.3532                  |
| 15 vs. 20                                | -40.94            | -341.1 to 259.2           | ns             | 0.8897                  |

**Supplementary Table 2:** Tukey's multiple comparisons statistics results for Fig. 3e, post two-way ANOVA. P values were adjusted for multiple comparison using statistical hypothesis testing.

| <b>Tukey's multiple comparisons test</b> | <b>Mean Diff.</b> | <b>95.00% CI of diff.</b> | <b>Summary</b> | <b>Adjusted P Value</b> |
|------------------------------------------|-------------------|---------------------------|----------------|-------------------------|
| Nuc: [5-20s] vs. Nuc:(20-50s]            | 5.701             | -0.2370 to 11.64          | ns             | 0.0655                  |
| Nuc: [5-20s] vs. Nuc:>50s                | 6.58              | 0.6415 to 12.52           | *              | 0.0235                  |
| Nuc: [5-20s] vs. CCM: [5-20s]            | -25.23            | -31.16 to -19.29          | ****           | <0.0001                 |
| Nuc: [5-20s] vs. CCM:(20-50s]            | 0.9476            | -4.990 to 6.886           | ns             | 0.9996                  |
| Nuc: [5-20s] vs. CCM:>50s                | 4.994             | -0.9443 to 10.93          | ns             | 0.1415                  |
| Nuc: [5-20s] vs. FTC: [5-20s]            | -7.338            | -13.28 to -1.400          | **             | 0.0094                  |
| Nuc: [5-20s] vs. FTC:(20-50s]            | -12.88            | -18.82 to -6.947          | ****           | <0.0001                 |
| Nuc: [5-20s] vs. FTC:>50s                | -4.815            | -10.75 to 1.123           | ns             | 0.1699                  |
| Nuc:(20-50s] vs. Nuc:>50s                | 0.8785            | -5.060 to 6.817           | ns             | 0.9998                  |
| Nuc:(20-50s] vs. CCM: [5-20s]            | -30.93            | -36.87 to -24.99          | ****           | <0.0001                 |
| Nuc:(20-50s] vs. CCM:(20-50s]            | -4.753            | -10.69 to 1.185           | ns             | 0.1806                  |
| Nuc:(20-50s] vs. CCM:>50s                | -0.7073           | -6.645 to 5.231           | ns             | >0.9999                 |
| Nuc:(20-50s] vs. FTC: [5-20s]            | -13.04            | -18.98 to -7.101          | ****           | <0.0001                 |
| Nuc:(20-50s] vs. FTC:(20-50s]            | -18.59            | -24.52 to -12.65          | ****           | <0.0001                 |
| Nuc:(20-50s] vs. FTC:>50s                | -10.52            | -16.45 to -4.578          | ***            | 0.0002                  |
| Nuc:>50s vs. CCM: [5-20s]                | -31.81            | -37.74 to -25.87          | ****           | <0.0001                 |
| Nuc:>50s vs. CCM:(20-50s]                | -5.632            | -11.57 to 0.3061          | ns             | 0.0708                  |
| Nuc:>50s vs. CCM:>50s                    | -1.586            | -7.524 to 4.352           | ns             | 0.9874                  |

|                                  |        |                  |      |         |
|----------------------------------|--------|------------------|------|---------|
| Nuc:>50s vs. FTC:<br>[5-20s]     | -13.92 | -19.86 to -7.979 | **** | <0.0001 |
| Nuc:>50s vs.<br>FTC:(20-50s]     | -19.46 | -25.40 to -13.53 | **** | <0.0001 |
| Nuc:>50s vs.<br>FTC:>50s         | -11.39 | -17.33 to -5.456 | **** | <0.0001 |
| CCM: [5-20s] vs.<br>CCM:(20-50s] | 26.17  | 20.24 to 32.11   | **** | <0.0001 |
| CCM: [5-20s] vs.<br>CCM:>50s     | 30.22  | 24.28 to 36.16   | **** | <0.0001 |
| CCM: [5-20s] vs.<br>FTC: [5-20s] | 17.89  | 11.95 to 23.83   | **** | <0.0001 |
| CCM: [5-20s] vs.<br>FTC:(20-50s] | 12.34  | 6.403 to 18.28   | **** | <0.0001 |
| CCM: [5-20s] vs.<br>FTC:>50s     | 20.41  | 14.47 to 26.35   | **** | <0.0001 |
| CCM:(20-50s] vs.<br>CCM:>50s     | 4.046  | -1.892 to 9.984  | ns   | 0.3461  |
| CCM:(20-50s] vs.<br>FTC: [5-20s] | -8.285 | -14.22 to -2.347 | **   | 0.003   |
| CCM:(20-50s] vs.<br>FTC:(20-50s] | -13.83 | -19.77 to -7.894 | **** | <0.0001 |
| CCM:(20-50s] vs.<br>FTC:>50s     | -5.762 | -11.70 to 0.1757 | ns   | 0.0611  |
| CCM:>50s vs. FTC:<br>[5-20s]     | -12.33 | -18.27 to -6.393 | **** | <0.0001 |
| CCM:>50s vs.<br>FTC:(20-50s]     | -17.88 | -23.82 to -11.94 | **** | <0.0001 |
| CCM:>50s vs.<br>FTC:>50s         | -9.809 | -15.75 to -3.871 | ***  | 0.0005  |
| FTC: [5-20s] vs.<br>FTC:(20-50s] | -5.547 | -11.49 to 0.3910 | ns   | 0.0779  |
| FTC: [5-20s] vs.<br>FTC:>50s     | 2.523  | -3.415 to 8.461  | ns   | 0.8468  |
| FTC:(20-50s] vs.<br>FTC:>50s     | 8.07   | 2.132 to 14.01   | **   | 0.0038  |

**Supplementary Table 3:** Signal detection cut-off manipulations and its influence over events classification reported as difference to cut-off used in main text (Fig. 3e)

| Mean % tracks                           | [5-20s]          |                   |                  | (20-50s)        |                 |                  | >50s            |                 |                   | Median for all events | Mode for all events  |
|-----------------------------------------|------------------|-------------------|------------------|-----------------|-----------------|------------------|-----------------|-----------------|-------------------|-----------------------|----------------------|
| # of frames to count signal as positive | Nuc              | CCM               | FTC              | Nuc             | CCM             | FTC              | Nuc             | CCM             | FTC               |                       |                      |
| 2<br>(0.6s)                             | 10.21<br>(+2.66) | 31.98<br>(-0.8)   | 15.08<br>(+0.19) | 3.15<br>(+1.30) | 9.91<br>(+3.30) | 15.68<br>(-4.76) | 1.71<br>(+0.74) | 2.93<br>(+0.38) | 9.35<br>(-3.01)   | 2.7s<br>(-0.9s)       | [0.5-1.5s]<br>(-1s)  |
| <b>5<br/>(1.5s)</b>                     | <b>7.55</b>      | <b>32.78</b>      | <b>14.89</b>     | <b>1.85</b>     | <b>6.60</b>     | <b>20.44</b>     | <b>0.97</b>     | <b>2.56</b>     | <b>12.37</b>      | <b>3.6s</b>           | <b>[1.5-2.5s]</b>    |
| 7<br>(2.1s)                             | 7.21<br>(-0.34)  | 32.12<br>(-0.66)  | 13.04<br>(-1.84) | 1.78<br>(-0.07) | 6.31<br>(-0.29) | 22.14<br>(+1.71) | 1.04<br>(+0.07) | 2.44<br>(-0.12) | 13.91<br>(+1.54)  | 3.9s<br>(+0.3s)       | [1.5-2.5s]<br>(ND)   |
| 11<br>(3.3s)                            | 6.85<br>(-0.70)  | 30.95<br>(-1.82)  | 10.59<br>(-4.30) | 1.54<br>(-0.31) | 6.21<br>(-0.40) | 23.85<br>(+3.41) | 0.94<br>(-0.03) | 2.76<br>(+0.21) | 16.32<br>(+3.95)  | 3.9s<br>(+0.3s)       | [1.5-2.5s]<br>(ND)   |
| 20<br>(6s)                              | 6.88<br>(-0.67)  | 22.16<br>(-10.62) | 9.53<br>(-5.36)  | 2.64<br>(+0.79) | 6.81<br>(+0.20) | 25.38<br>(+4.94) | 1.74<br>(+0.77) | 2.22<br>(-0.34) | 22.65<br>(+10.28) | 5.7s<br>(+2.1s)       | [-0.5-0.5s]<br>(-2s) |



**Supplementary Table 4:** Tukey's multiple comparisons statistics results for Fig. 4g (Ctrl siRNA), post two-way ANOVA. P values were adjusted for multiple comparison using statistical hypothesis testing.

| <b>Tukey's multiple comparisons test</b> | <b>Mean Diff.</b> | <b>95.00% CI of diff.</b> | <b>Summary</b> | <b>Adjusted P Value</b> |
|------------------------------------------|-------------------|---------------------------|----------------|-------------------------|
| Nuc:[5-20s] vs. Nuc:(20-50s]             | 3.977             | -1.423 to 9.378           | ns             | 0.2599                  |
| Nuc:[5-20s] vs. Nuc:>50s                 | 5.996             | 0.5954 to 11.40           | *              | 0.0231                  |
| Nuc:[5-20s] vs. CCM:[5-20s]              | -18.53            | -23.93 to -13.13          | ****           | <0.0001                 |
| Nuc:[5-20s] vs. CCM:(20-50s]             | -1.218            | -6.618 to 4.183           | ns             | 0.9958                  |
| Nuc:[5-20s] vs. CCM:>50s                 | 4.426             | -0.9748 to 9.826          | ns             | 0.1613                  |
| Nuc:[5-20s] vs. FTC:[5-20s]              | -6.902            | -12.30 to -1.501          | **             | 0.0069                  |
| Nuc:[5-20s] vs. FTC:(20-50s]             | -15.84            | -21.24 to -10.44          | ****           | <0.0001                 |
| Nuc:[5-20s] vs. FTC:>50s                 | -7.956            | -13.36 to -2.556          | **             | 0.0017                  |
| Nuc:(20-50s] vs. Nuc:>50s                | 2.019             | -3.382 to 7.419           | ns             | 0.9157                  |
| Nuc:(20-50s] vs. CCM:[5-20s]             | -22.5             | -27.90 to -17.10          | ****           | <0.0001                 |
| Nuc:(20-50s] vs. CCM:(20-50s]            | -5.195            | -10.60 to 0.2056          | ns             | 0.0647                  |
| Nuc:(20-50s] vs. CCM:>50s                | 0.4483            | -4.952 to 5.849           | ns             | >0.9999                 |
| Nuc:(20-50s] vs. FTC:[5-20s]             | -10.88            | -16.28 to -5.479          | ****           | <0.0001                 |
| Nuc:(20-50s] vs. FTC:(20-50s]            | -19.82            | -25.22 to -14.42          | ****           | <0.0001                 |
| Nuc:(20-50s] vs. FTC:>50s                | -11.93            | -17.33 to -6.533          | ****           | <0.0001                 |
| Nuc:>50s vs. CCM:[5-20s]                 | -24.52            | -29.92 to -19.12          | ****           | <0.0001                 |
| Nuc:>50s vs. CCM:(20-50s]                | -7.213            | -12.61 to -1.813          | **             | 0.0045                  |
| Nuc:>50s vs. CCM:>50s                    | -1.57             | -6.971 to 3.830           | ns             | 0.9788                  |

|                                  |        |                   |      |         |
|----------------------------------|--------|-------------------|------|---------|
| Nuc:>50s vs.<br>FTC:[5-20s]      | -12.9  | -18.30 to -7.497  | **** | <0.0001 |
| Nuc:>50s vs.<br>FTC:(20-50s]     | -21.84 | -27.24 to -16.44  | **** | <0.0001 |
| Nuc:>50s vs.<br>FTC:>50s         | -13.95 | -19.35 to -8.552  | **** | <0.0001 |
| CCM:[5-20s] vs.<br>CCM:(20-50s]  | 17.31  | 11.91 to 22.71    | **** | <0.0001 |
| CCM:[5-20s] vs.<br>CCM:>50s      | 22.95  | 17.55 to 28.35    | **** | <0.0001 |
| CCM:[5-20s] vs.<br>FTC:[5-20s]   | 11.62  | 6.224 to 17.02    | **** | <0.0001 |
| CCM:[5-20s] vs.<br>FTC:(20-50s]  | 2.684  | -2.717 to 8.084   | ns   | 0.716   |
| CCM:[5-20s] vs.<br>FTC:>50s      | 10.57  | 5.169 to 15.97    | **** | <0.0001 |
| CCM:(20-50s] vs.<br>CCM:>50s     | 5.643  | 0.2427 to 11.04   | *    | 0.0367  |
| CCM:(20-50s] vs.<br>FTC:[5-20s]  | -5.684 | -11.08 to -0.2837 | *    | 0.0348  |
| CCM:(20-50s] vs.<br>FTC:(20-50s] | -14.62 | -20.03 to -9.224  | **** | <0.0001 |
| CCM:(20-50s] vs.<br>FTC:>50s     | -6.739 | -12.14 to -1.338  | **   | 0.0086  |
| CCM:>50s vs.<br>FTC:[5-20s]      | -11.33 | -16.73 to -5.927  | **** | <0.0001 |
| CCM:>50s vs.<br>FTC:(20-50s]     | -20.27 | -25.67 to -14.87  | **** | <0.0001 |
| CCM:>50s vs.<br>FTC:>50s         | -12.38 | -17.78 to -6.982  | **** | <0.0001 |
| FTC:[5-20s] vs.<br>FTC:(20-50s]  | -8.941 | -14.34 to -3.540  | ***  | 0.0005  |
| FTC:[5-20s] vs.<br>FTC:>50s      | -1.055 | -6.455 to 4.346   | ns   | 0.9984  |
| FTC:(20-50s] vs.<br>FTC:>50s     | 7.886  | 2.485 to 13.29    | **   | 0.0018  |

**Supplementary Table 5:** Tukey's multiple comparisons statistics results for Fig. 4g (CLCa siRNA) after two-way ANOVA. P values were adjusted for multiple comparison using statistical hypothesis testing.

| <b>Tukey's multiple comparisons test</b> | <b>Mean Diff.</b> | <b>95.00% CI of diff.</b> | <b>Summary</b> | <b>Adjusted P Value</b> |
|------------------------------------------|-------------------|---------------------------|----------------|-------------------------|
| Nuc:[5-20s] vs. Nuc:(20-50s]             | 3.55              | -4.236 to 11.34           | ns             | 0.7944                  |
| Nuc:[5-20s] vs. Nuc:>50s                 | 5.584             | -2.202 to 13.37           | ns             | 0.2882                  |
| Nuc:[5-20s] vs. CCM:[5-20s]              | -16.08            | -23.86 to -8.291          | ****           | <0.0001                 |
| Nuc:[5-20s] vs. CCM:(20-50s]             | -2.901            | -10.69 to 4.885           | ns             | 0.917                   |
| Nuc:[5-20s] vs. CCM:>50s                 | 3.23              | -4.556 to 11.02           | ns             | 0.8621                  |
| Nuc:[5-20s] vs. FTC:[5-20s]              | -5.417            | -13.20 to 2.369           | ns             | 0.3221                  |
| Nuc:[5-20s] vs. FTC:(20-50s]             | -19.26            | -27.05 to -11.48          | ****           | <0.0001                 |
| Nuc:[5-20s] vs. FTC:>50s                 | -11.48            | -19.27 to -3.695          | **             | 0.0017                  |
| Nuc:(20-50s] vs. Nuc:>50s                | 2.034             | -5.752 to 9.820           | ns             | 0.989                   |
| Nuc:(20-50s] vs. CCM:[5-20s]             | -19.63            | -27.41 to -11.84          | ****           | <0.0001                 |
| Nuc:(20-50s] vs. CCM:(20-50s]            | -6.452            | -14.24 to 1.334           | ns             | 0.1526                  |
| Nuc:(20-50s] vs. CCM:>50s                | -0.32             | -8.106 to 7.466           | ns             | >0.9999                 |
| Nuc:(20-50s] vs. FTC:[5-20s]             | -8.967            | -16.75 to -1.181          | *              | 0.0172                  |
| Nuc:(20-50s] vs. FTC:(20-50s]            | -22.81            | -30.60 to -15.03          | ****           | <0.0001                 |
| Nuc:(20-50s] vs. FTC:>50s                | -15.03            | -22.82 to -7.245          | ****           | <0.0001                 |
| Nuc:>50s vs. CCM:[5-20s]                 | -21.66            | -29.45 to -13.88          | ****           | <0.0001                 |
| Nuc:>50s vs. CCM:(20-50s]                | -8.486            | -16.27 to -0.6993         | *              | 0.0267                  |
| Nuc:>50s vs. CCM:>50s                    | -2.354            | -10.14 to 5.432           | ns             | 0.9733                  |

|                                  |        |                    |      |         |
|----------------------------------|--------|--------------------|------|---------|
| Nuc:>50s vs.<br>FTC:[5-20s]      | -11    | -18.79 to -3.215   | **   | 0.0026  |
| Nuc:>50s vs.<br>FTC:(20-50s]     | -24.85 | -32.63 to -17.06   | **** | <0.0001 |
| Nuc:>50s vs.<br>FTC:>50s         | -17.07 | -24.85 to -9.279   | **** | <0.0001 |
| CCM:[5-20s] vs.<br>CCM:(20-50s]  | 13.18  | 5.390 to 20.96     | ***  | 0.0004  |
| CCM:[5-20s] vs.<br>CCM:>50s      | 19.31  | 11.52 to 27.09     | **** | <0.0001 |
| CCM:[5-20s] vs.<br>FTC:[5-20s]   | 10.66  | 2.874 to 18.45     | **   | 0.0036  |
| CCM:[5-20s] vs.<br>FTC:(20-50s]  | -3.185 | -10.97 to 4.601    | ns   | 0.8706  |
| CCM:[5-20s] vs.<br>FTC:>50s      | 4.596  | -3.190 to 12.38    | ns   | 0.5208  |
| CCM:(20-50s] vs.<br>CCM:>50s     | 6.132  | -1.654 to 13.92    | ns   | 0.1949  |
| CCM:(20-50s] vs.<br>FTC:[5-20s]  | -2.516 | -10.30 to 5.271    | ns   | 0.961   |
| CCM:(20-50s] vs.<br>FTC:(20-50s] | -16.36 | -24.15 to -8.575   | **** | <0.0001 |
| CCM:(20-50s] vs.<br>FTC:>50s     | -8.58  | -16.37 to -0.7936  | *    | 0.0246  |
| CCM:>50s vs.<br>FTC:[5-20s]      | -8.647 | -16.43 to -0.8613  | *    | 0.0231  |
| CCM:>50s vs.<br>FTC:(20-50s]     | -22.49 | -30.28 to -14.71   | **** | <0.0001 |
| CCM:>50s vs.<br>FTC:>50s         | -14.71 | -22.50 to -6.925   | **** | <0.0001 |
| FTC:[5-20s] vs.<br>FTC:(20-50s]  | -13.85 | -21.63 to -6.059   | ***  | 0.0002  |
| FTC:[5-20s] vs.<br>FTC:>50s      | -6.064 | -13.85 to 1.722    | ns   | 0.205   |
| FTC:(20-50s] vs.<br>FTC:>50s     | 7.781  | -0.004815 to 15.57 | ns   | 0.0502  |

**Supplementary Table 6:** Tukey's multiple comparisons statistics results of differences between Ctrl and CLCa targeting siRNA from Fig. 4g, post two-way ANOVA. P values were adjusted for multiple comparison using statistical hypothesis testing.

| Tukey's multiple comparisons test | Mean Diff. | 95.00% CI of diff. | Summary | Adjusted P Value |
|-----------------------------------|------------|--------------------|---------|------------------|
| <b>Nuc</b>                        |            |                    |         |                  |
| CTRL [5-20s] vs. CTRL (20-50s]    | 3.977      | -1.776 to 9.730    | ns      | 0.3202           |
| CTRL [5-20s] vs. CTRL >50s        | 5.996      | 0.2426 to 11.75    | *       | 0.0369           |
| CTRL [5-20s] vs. CLCa [5-20s]     | 0.7478     | -5.005 to 6.501    | ns      | 0.9987           |
| CTRL [5-20s] vs. CLCa (20-50s]    | 4.298      | -1.455 to 10.05    | ns      | 0.242            |
| CTRL [5-20s] vs. CLCa >50s        | 6.332      | 0.5787 to 12.09    | *       | 0.0239           |
| CTRL (20-50s] vs. CTRL >50s       | 2.019      | -3.735 to 7.772    | ns      | 0.8954           |
| CTRL (20-50s] vs. CLCa [5-20s]    | -3.229     | -8.983 to 2.524    | ns      | 0.5477           |
| CTRL (20-50s] vs. CLCa (20-50s]   | 0.3209     | -5.432 to 6.074    | ns      | >0.9999          |
| CTRL (20-50s] vs. CLCa >50s       | 2.355      | -3.399 to 8.108    | ns      | 0.8187           |
| CTRL >50s vs. CLCa [5-20s]        | -5.248     | -11.00 to 0.5052   | ns      | 0.0909           |
| CTRL >50s vs. CLCa (20-50s]       | -1.698     | -7.451 to 4.056    | ns      | 0.947            |
| CTRL >50s vs. CLCa >50s           | 0.3361     | -5.417 to 6.089    | ns      | >0.9999          |
| CLCa [5-20s] vs. CLCa (20-50s]    | 3.55       | -2.203 to 9.304    | ns      | 0.4442           |
| CLCa [5-20s] vs. CLCa >50s        | 5.584      | -0.1691 to 11.34   | ns      | 0.0614           |
| CLCa (20-50s] vs. CLCa >50s       | 2.034      | -3.719 to 7.787    | ns      | 0.8924           |
| <b>CCM</b>                        |            |                    |         |                  |
| CTRL [5-20s] vs. CTRL (20-50s]    | 17.31      | 11.56 to 23.06     | ****    | <0.0001          |
| CTRL [5-20s] vs. CTRL >50s        | 22.95      | 17.20 to 28.70     | ****    | <0.0001          |

|                                 |         |                   |      |         |
|---------------------------------|---------|-------------------|------|---------|
| CTRL [5-20s] vs. CLCa [5-20s]   | 3.196   | -2.557 to 8.949   | ns   | 0.5587  |
| CTRL [5-20s] vs. CLCa (20-50s)  | 16.37   | 10.62 to 22.13    | **** | <0.0001 |
| CTRL [5-20s] vs. CLCa >50s      | 22.5    | 16.75 to 28.26    | **** | <0.0001 |
| CTRL (20-50s) vs. CTRL >50s     | 5.643   | -0.1101 to 11.40  | ns   | 0.0572  |
| CTRL (20-50s) vs. CLCa [5-20s]  | -14.11  | -19.87 to -8.359  | **** | <0.0001 |
| CTRL (20-50s) vs. CLCa (20-50s) | -0.9361 | -6.689 to 4.817   | ns   | 0.9963  |
| CTRL (20-50s) vs. CLCa >50s     | 5.196   | -0.5575 to 10.95  | ns   | 0.0964  |
| CTRL >50s vs. CLCa [5-20s]      | -19.76  | -25.51 to -14.00  | **** | <0.0001 |
| CTRL >50s vs. CLCa (20-50s)     | -6.579  | -12.33 to -0.8260 | *    | 0.0172  |
| CTRL >50s vs. CLCa >50s         | -0.4474 | -6.201 to 5.306   | ns   | 0.9999  |
| CLCa [5-20s] vs. CLCa (20-50s)  | 13.18   | 7.423 to 18.93    | **** | <0.0001 |
| CLCa [5-20s] vs. CLCa >50s      | 19.31   | 13.55 to 25.06    | **** | <0.0001 |
| CLCa (20-50s) vs. CLCa >50s     | 6.132   | 0.3786 to 11.89   | *    | 0.031   |
| <b>FTC</b>                      |         |                   |      |         |
| CTRL [5-20s] vs. CTRL (20-50s)  | -8.941  | -14.69 to -3.187  | ***  | 0.0005  |
| CTRL [5-20s] vs. CTRL >50s      | -1.055  | -6.808 to 4.699   | ns   | 0.9935  |
| CTRL [5-20s] vs. CLCa [5-20s]   | 2.232   | -3.521 to 7.986   | ns   | 0.8491  |
| CTRL [5-20s] vs. CLCa (20-50s)  | -11.61  | -17.37 to -5.860  | **** | <0.0001 |
| CTRL [5-20s] vs. CLCa >50s      | -3.832  | -9.585 to 1.921   | ns   | 0.3602  |
| CTRL (20-50s) vs. CTRL >50s     | 7.886   | 2.133 to 13.64    | **   | 0.0027  |
| CTRL (20-50s) vs. CLCa [5-20s]  | 11.17   | 5.420 to 16.93    | **** | <0.0001 |

|                                    |        |                   |      |         |
|------------------------------------|--------|-------------------|------|---------|
| CTRL (20-50s) vs.<br>CLCa (20-50s] | -2.673 | -8.426 to 3.081   | ns   | 0.7281  |
| CTRL (20-50s] vs.<br>CLCa >50s     | 5.109  | -0.6444 to 10.86  | ns   | 0.1063  |
| CTRL >50s vs.<br>CLCa [5-20s]      | 3.287  | -2.466 to 9.040   | ns   | 0.5288  |
| CTRL >50s vs.<br>CLCa (20-50s]     | -10.56 | -16.31 to -4.805  | **** | <0.0001 |
| CTRL >50s vs.<br>CLCa >50s         | -2.777 | -8.530 to 2.976   | ns   | 0.6956  |
| CLCa [5-20s] vs.<br>CLCa (20-50s]  | -13.85 | -19.60 to -8.092  | **** | <0.0001 |
| CLCa [5-20s] vs.<br>CLCa >50s      | -6.064 | -11.82 to -0.3110 | *    | 0.0338  |
| CLCa (20-50s] vs.<br>CLCa >50s     | 7.781  | 2.028 to 13.53    | **   | 0.0031  |

**Supplementary Table 7:** Tukey's multiple comparisons statistics results for Fig. 5j, post two-way ANOVA. P values were adjusted for multiple comparison using statistical hypothesis testing.

| <b>Tukey's multiple comparisons test</b> | <b>Mean Diff.</b> | <b>95.00% CI of diff.</b> | <b>Summary</b> | <b>Adjusted P Value</b> |
|------------------------------------------|-------------------|---------------------------|----------------|-------------------------|
| Nuc: [5-20s] vs. Nuc:(20-50s]            | 5.726             | -5.313 to 16.77           | ns             | 0.6715                  |
| Nuc: [5-20s] vs. Nuc:>50s                | 7.492             | -3.547 to 18.53           | ns             | 0.3509                  |
| Nuc: [5-20s] vs. CCM: [5-20s]            | -17.68            | -28.72 to -6.645          | ***            | 0.0007                  |
| Nuc: [5-20s] vs. CCM:(20-50s]            | 0.9831            | -10.06 to 12.02           | ns             | >0.9999                 |
| Nuc: [5-20s] vs. CCM:>50s                | 4.939             | -6.100 to 15.98           | ns             | 0.8094                  |
| Nuc: [5-20s] vs. FTC: [5-20s]            | -5.714            | -16.75 to 5.325           | ns             | 0.6738                  |
| Nuc: [5-20s] vs. FTC:(20-50s]            | -5.582            | -16.62 to 5.457           | ns             | 0.6984                  |
| Nuc: [5-20s] vs. FTC:>50s                | -3.026            | -14.06 to 8.013           | ns             | 0.9851                  |
| Nuc:(20-50s] vs. Nuc:>50s                | 1.765             | -9.274 to 12.80           | ns             | 0.9996                  |
| Nuc:(20-50s] vs. CCM: [5-20s]            | -23.41            | -34.45 to -12.37          | ****           | <0.0001                 |
| Nuc:(20-50s] vs. CCM:(20-50s]            | -4.743            | -15.78 to 6.296           | ns             | 0.8392                  |
| Nuc:(20-50s] vs. CCM:>50s                | -0.7869           | -11.83 to 10.25           | ns             | >0.9999                 |
| Nuc:(20-50s] vs. FTC: [5-20s]            | -11.44            | -22.48 to -0.4010         | *              | 0.0389                  |
| Nuc:(20-50s] vs. FTC:(20-50s]            | -11.31            | -22.35 to -0.2690         | *              | 0.0423                  |
| Nuc:(20-50s] vs. FTC:>50s                | -8.752            | -19.79 to 2.287           | ns             | 0.189                   |
| Nuc:>50s vs. CCM: [5-20s]                | -25.18            | -36.21 to -14.14          | ****           | <0.0001                 |
| Nuc:>50s vs. CCM:(20-50s]                | -6.509            | -17.55 to 4.530           | ns             | 0.5224                  |
| Nuc:>50s vs. CCM:>50s                    | -2.552            | -13.59 to 8.487           | ns             | 0.995                   |



|                                  |        |                  |      |         |
|----------------------------------|--------|------------------|------|---------|
| Nuc:>50s vs. FTC:<br>[5-20s]     | -13.21 | -24.24 to -2.166 | *    | 0.0125  |
| Nuc:>50s vs.<br>FTC:(20-50s]     | -13.07 | -24.11 to -2.034 | *    | 0.0136  |
| Nuc:>50s vs.<br>FTC:>50s         | -10.52 | -21.56 to 0.5214 | ns   | 0.0688  |
| CCM: [5-20s] vs.<br>CCM:(20-50s] | 18.67  | 7.628 to 29.71   | ***  | 0.0004  |
| CCM: [5-20s] vs.<br>CCM:>50s     | 22.62  | 11.58 to 33.66   | **** | <0.0001 |
| CCM: [5-20s] vs.<br>FTC: [5-20s] | 11.97  | 0.9311 to 23.01  | *    | 0.0278  |
| CCM: [5-20s] vs.<br>FTC:(20-50s] | 12.1   | 1.063 to 23.14   | *    | 0.0256  |
| CCM: [5-20s] vs.<br>FTC:>50s     | 14.66  | 3.619 to 25.70   | **   | 0.0048  |
| CCM:(20-50s] vs.<br>CCM:>50s     | 3.956  | -7.083 to 15.00  | ns   | 0.9319  |
| CCM:(20-50s] vs.<br>FTC: [5-20s] | -6.697 | -17.74 to 4.342  | ns   | 0.4873  |
| CCM:(20-50s] vs.<br>FTC:(20-50s] | -6.565 | -17.60 to 4.474  | ns   | 0.5118  |
| CCM:(20-50s] vs.<br>FTC:>50s     | -4.009 | -15.05 to 7.030  | ns   | 0.9271  |
| CCM:>50s vs. FTC:<br>[5-20s]     | -10.65 | -21.69 to 0.3859 | ns   | 0.0634  |
| CCM:>50s vs.<br>FTC:(20-50s]     | -10.52 | -21.56 to 0.5179 | ns   | 0.0687  |
| CCM:>50s vs.<br>FTC:>50s         | -7.965 | -19.00 to 3.074  | ns   | 0.2816  |
| FTC: [5-20s] vs.<br>FTC:(20-50s] | 0.132  | -10.91 to 11.17  | ns   | >0.9999 |
| FTC: [5-20s] vs.<br>FTC:>50s     | 2.688  | -8.351 to 13.73  | ns   | 0.993   |
| FTC:(20-50s] vs.<br>FTC:>50s     | 2.556  | -8.483 to 13.59  | ns   | 0.995   |

**Supplementary Table 8:** Key parameters and executable codes used for automated data processing.

| <b>Parameters used in automatic processing</b>                                                                                                                                                                                                                                                                                                                            |                                                                                       |
|---------------------------------------------------------------------------------------------------------------------------------------------------------------------------------------------------------------------------------------------------------------------------------------------------------------------------------------------------------------------------|---------------------------------------------------------------------------------------|
| <b>CMEanalysis for frame rate(FR) 0.3s</b>                                                                                                                                                                                                                                                                                                                                |                                                                                       |
| Example code run for control group:                                                                                                                                                                                                                                                                                                                                       |                                                                                       |
| <pre>&gt;&gt; data = loadConditionData('/data/user/tnawara/Data/Data analysis/AA_First paper/Revisions/siRNA/Exp3/CLCa_CTRL_exp3', 'Ch1', 'Ch2', 'Ch3'}, 'EGFP', 'iRFP713', 'dZ'}, 'Parameters', [1.49 60 6.45e-6]); &gt;&gt;[resCTRL, dataCTRL] = cmeAnalysis(data, 'ControlData', resCTRL, 'Overwrite', false, 'TrackingRadius', [1 3], 'TrackingGapLength', 13);</pre> |                                                                                       |
| Example code run for experimental group:                                                                                                                                                                                                                                                                                                                                  |                                                                                       |
| <pre>&gt;&gt; data = loadConditionData('/data/user/tnawara/Data/Data analysis/AA_First paper/Revisions/siRNA/Exp3/CLCa_siRNA_exp3', 'Ch1', 'Ch2', 'Ch3'}, 'EGFP', 'iRFP713', 'dZ'}, 'Parameters', [1.49 60 6.45e-6]); &gt;&gt;[resKD, dataKD] = cmeAnalysis(data, 'ControlData', resCTRL, 'Overwrite', false, 'TrackingRadius', [1 3], 'TrackingGapLength', 13);</pre>    |                                                                                       |
| 1) 'Parameters'                                                                                                                                                                                                                                                                                                                                                           | [1.49 60 6.45e-6] / [NA Obj_Mag<br>Camera_pix_size]                                   |
| 2) 'TrackingRadius'                                                                                                                                                                                                                                                                                                                                                       | [1 3]                                                                                 |
| 3) 'TrackingGapLength'                                                                                                                                                                                                                                                                                                                                                    | 13 (13*FR = 3.9s)<br>filtered and valid tracks Median Gap length = 1                  |
| 4) Start and end track buffer @<br>runTrackProcessing.m                                                                                                                                                                                                                                                                                                                   | [15 15] (15*0.3 = 4.5s)                                                               |
| 5) Minimum track lifetime @<br>runTrackProcessing.m                                                                                                                                                                                                                                                                                                                       | 6*0.3 = 1.8s                                                                          |
| <b>cme_wraper.m @ dz_beginning.m</b>                                                                                                                                                                                                                                                                                                                                      |                                                                                       |
| 1) Track length                                                                                                                                                                                                                                                                                                                                                           | ≥ 5s                                                                                  |
| 2) Single track with valid gaps                                                                                                                                                                                                                                                                                                                                           | Category 1a (determined by CMEanalysis)                                               |
| 3) Is track iRFP713 and Δz positive                                                                                                                                                                                                                                                                                                                                       | [1,1] (determined by CMEanalysis @<br>ProcessedTracks.mat -> tracks.significantSlave) |
| 4) Numbers of the consecutive positive frame<br>over the background to count signal beginning                                                                                                                                                                                                                                                                             | 5                                                                                     |
| 5) Signal smoothing range for movmean                                                                                                                                                                                                                                                                                                                                     | 3                                                                                     |
| 6) Frames below the threshold to count signal as<br>de novo                                                                                                                                                                                                                                                                                                               | 3                                                                                     |
| 7) Determining whether the signal is higher than<br>background                                                                                                                                                                                                                                                                                                            | signal + background > 2*SD + background                                               |
| 8) Quality of iRFP713 signal                                                                                                                                                                                                                                                                                                                                              | above the threshold for more than 70% of EGFP<br>signal                               |

| <b>cohort_wraper.m @ CCV_vs_FCL_graph_generator.m</b>                                   |                                                                                    |
|-----------------------------------------------------------------------------------------|------------------------------------------------------------------------------------|
| 1) Track length                                                                         | ≥ 5s                                                                               |
| 2) Single track with valid gaps                                                         | Category 1a (determined by CMEanalysis)                                            |
| 3) Is track iRFP713 and Δz positive                                                     | [1,1] (determined by CMEanalysis @ ProcessedTracks.mat -> tracks.significantSlave) |
| 4) numbers of the consecutive positive frames over background to count signal beginning | 5                                                                                  |
| 5) Signal smoothing range for movmean                                                   | 3                                                                                  |
| 6) Frames below the threshold to count signal as de novo                                | 3                                                                                  |
| 7) Last n frames have to be under threshold                                             | 3                                                                                  |
| 8) Amount of Δz frames above the threshold to count events as Δz positive               | more than 30% of EGFP signal                                                       |
| 9) Amount of Δz frames below the threshold to count events as Δz negative               | 100%                                                                               |
| 10) Mean and SD of Δz negative signal                                                   | (-25nm ≤ signal ≤ 25 nm)                                                           |

**Fig. 1e - Raw western blots:** Green – CLCa, Red – GAPDH, used in the manuscript

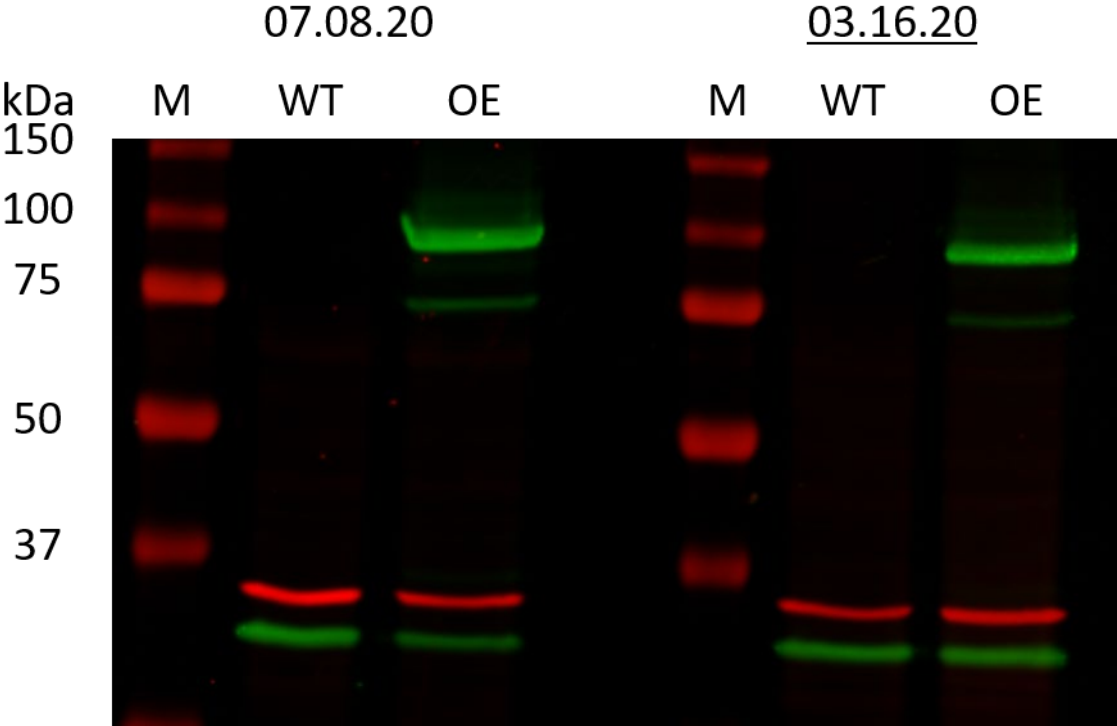

**Fig. 4b - Raw western blots:** Green – CLCa, Red – GAPDH, used in the manuscript

09.08.21

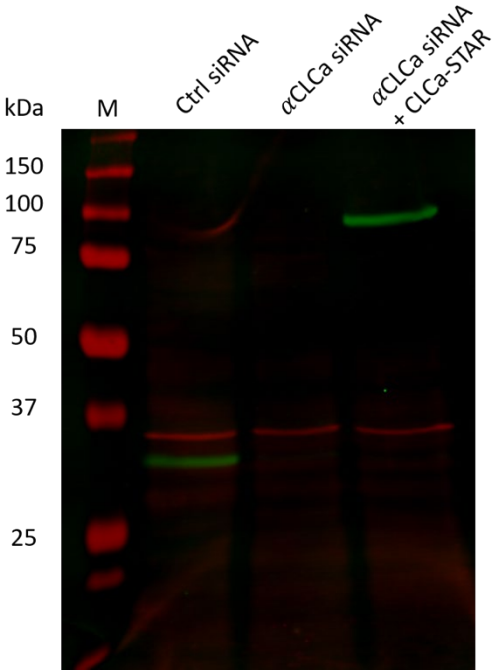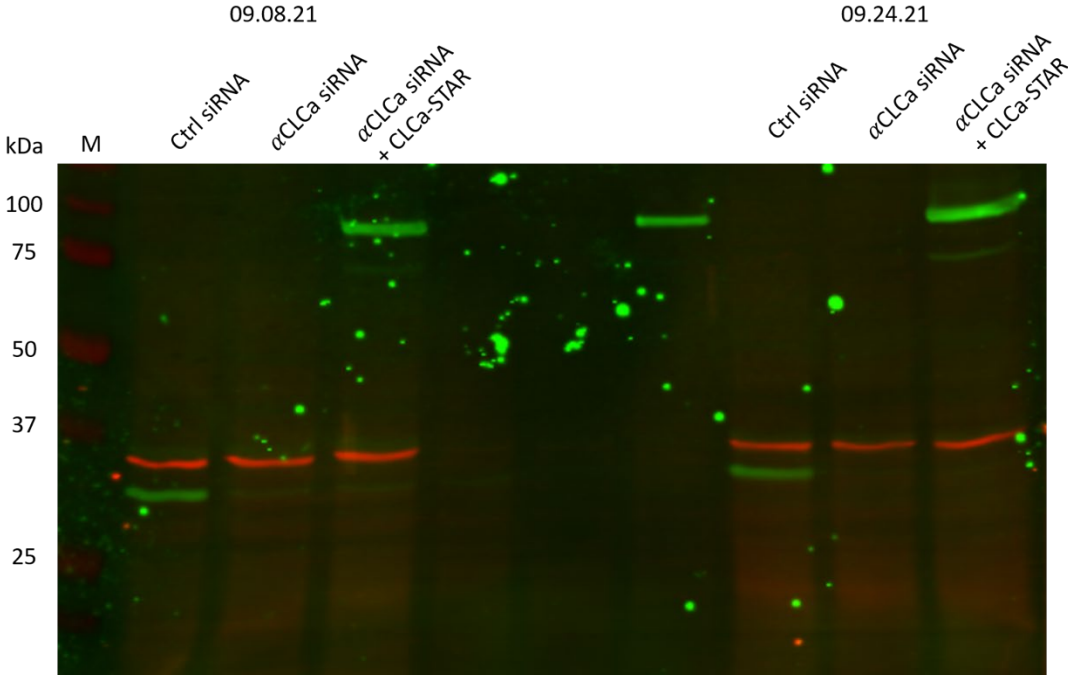

**Fig. 5b - Raw western blots:** Green – CLCa, Red – GAPDH, used in the manuscript

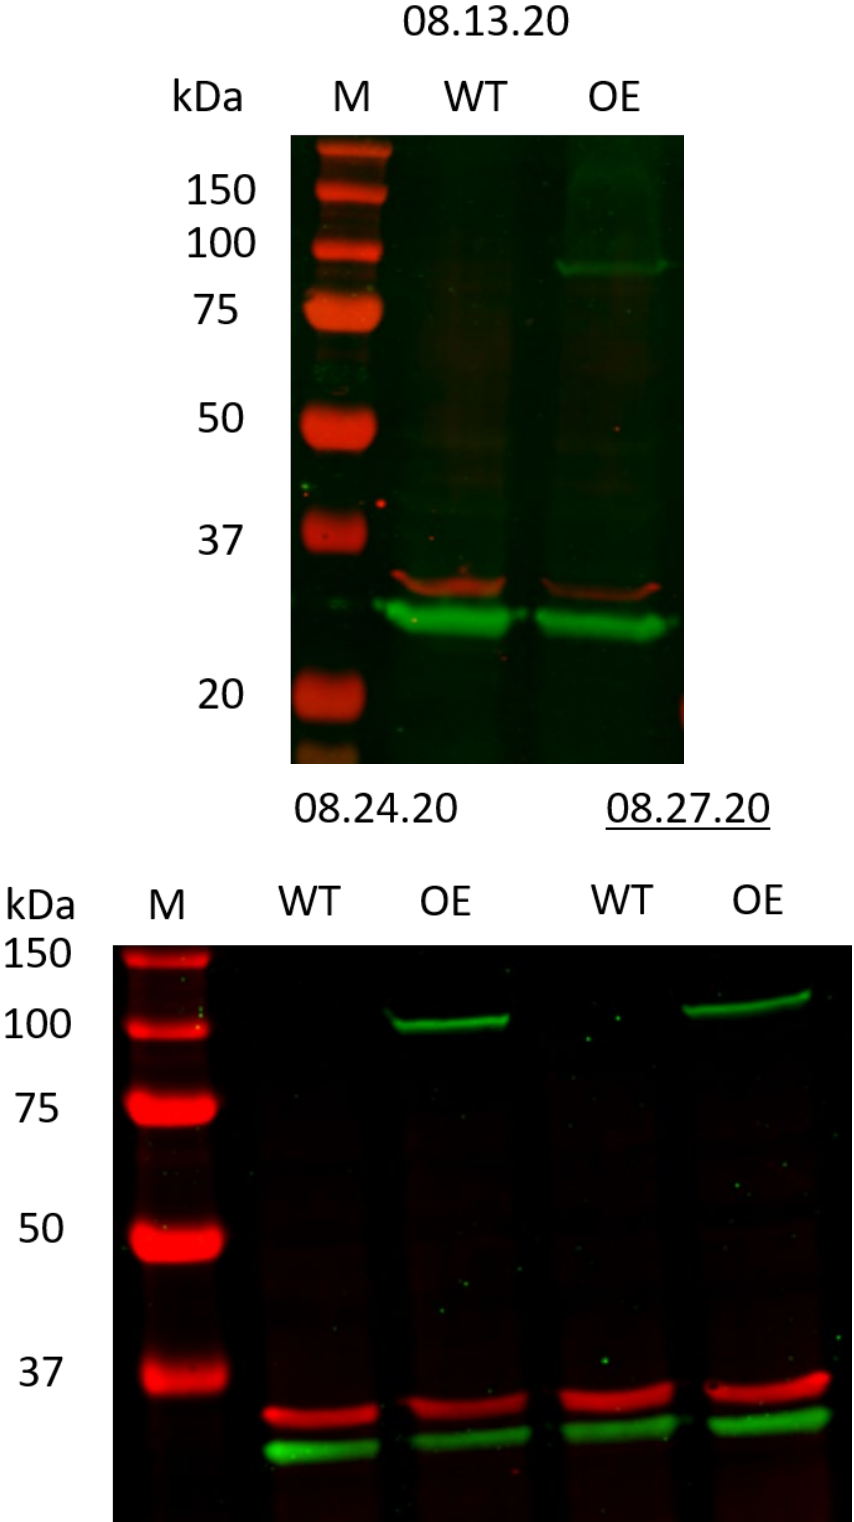

Supplement: MOESM1 [file 41467_2022_29317_MOESM1_ESM.pdf]
